# Supplementary material
Source: Research Square preprint supplement (doi:10.21203/rs.3.rs-8995237/v1)
Supplement: Supplementary file 1 [file 3c9c63eeb5f650f99dbe1523.docx]

**Table 1** Basic parameters of the sampled *Quercus*  robur trees and their habitat, Dnipropetrovsk Region near village of Bashmachka, Ukraine. (*- Light intensity was measured on the upper surface of leaf blades from the lowest tier of branches).

| Oak tree  number | Approximate oak age, years | Light intensity on sampling day,  μmol·m-2·s-1 | Oak habitat | Shadiness at the level of lower oak branches, % |
| --- | --- | --- | --- | --- |
| No. 1  No. 2  No. 3  No. 4 | ~130-150  ~50  ~80  ~80 | 900*  50  1500  1500 | Single trees on the forest edge dese forest  Dense forest.  Single trees in the upper reaches of a gully.  Single trees in the upper part of a gully. | 40.0  96.6  0.0  0.0 |

**Table 2** Morphological parameters of leaves of *Quercus robur* growing in the southern steppes of Ukraine, Dnipropetrovsk Region; ('a' notes significant differences in parameters between tree No. 1 (shaded) and No. 3 (unshaded) (P ≤ 0.05), while 'b' notes significant differences within the parameters of a single tree. 2 (Shaded trees) from tree No. 3 (without shading) (P ≤ 0.05). "c" indicates significant differences in parameters for trees No. 1 (shaded) and No. 4 (unshaded) (P ≤ 0.05), while "d" indicates significant differences in parameters for trees No. 2 (shaded) and No. 4 (unshaded) (P ≤ 0.05).

| Parameter | Oak tree number | | | |
| --- | --- | --- | --- | --- |
| Tree No 1 | Tree No. 2 | Tree No. 3 | Tree No. 4 |
| Leaf size, mm  Long axis  Short axis (in  the 2nd lobe)  Leaf area*, mm2 | 105 ± 9.1  42 ± 5.7  4665 ± 133 | 130 ± 12.1  57 ± 3.7  6057 ± 141 | 75 ± 7.1a, b  33 ± 5.1 a, b  3188 ± 153 a, b | 78 ± 5.7 c, d  32 ± 3.9 c, d  2729 ± 131 c, d |

**Table 3** The structural parameters of *Quercus robur* leaves

(*- The surface of the pavement cells of the lower epidermis is covered with a ontinuous layer of lamellar crystalline structures, so the boundaries of the pavement cells of the lower epidermis are not visible and their sizes are not determined. **a**denotes significant differences in the parameters in tree No. 1 (shading) and No. 3 (without shading) (P ≤ 0.05); **b** denotes significant differences in the parameters in the tree No. 2 (shading) and No. 3 (without shading) (P ≤ 0.05); **c** denotes significant differences in the parameters in the tree No. 1 (shading) and No.4 (without shading) (P ≤ 0.05); d denotes significant differences in the parameters in the tree Nr 2 (shading) and No.4 (without shading) (P ≤ 0.05).

| Parameter | Oak tree number | | | |
| --- | --- | --- | --- | --- |
| Tree No. 1 | Tree No. 2 | Tree No. 3 | Tree No. 4 |
| *Adaxial epidermis*  Size of pavement cell, μm  Long axis  Short axis  *Stomata*  *Trichome*  *Abaxial epidermis*  Size of pavement cell, μm  *Stomata*  Density, number per mm2 area  Long axis of guard cell , μm  Short axis of guard cell, μm  *Trichome*  Density, number per mm2 area  Long axis, μm  Short axis in the base, μm  Short axis in the very middle, μm | 23 ± 1.3  20 ± 1.2  Absent  Absent  Not determi-ned*    350 ± 21  29 ± 1.2  11 ± 0.4    78 ± 8.9  98 ± 7.1  20 ± 1.5    8.3 ± 0.1 | 21 ± 1.3  18 ± 1.1  Absent  Absent  Not determi-ned*      380 ± 27  23 ± 1.7  10 ± 0.4    71 ± 7.0  82 ± 7.3  13.6 ± 1.3    7.3 ± 0.1 | 25 ± 1.2  24 ± 1.7  Absent  Absent  Not determi-ned*  531 ± 37 a, b  28 ± 1.3  10 ± 0.1    87 ± 7.3 a, b  72 ± 8.9  21 ± 1.2    7.3 ± 0.7 | 26 ± 1.2  23 ± 1.3  Absent  Absent  Not determi-ned*  429 ± 47 c,d  30 ± 1.1  12 ± 0.7    86 ± 7.9 c, d  76 ± 9.5  20 ± 1.5    8.0 ± 0.3 |

**Table 4.** The intensity profile of silicon inclusions (in relative units) in cell walls of the leaf epidermis of *Quercus* robur shaded trees (No. 1 and No. 2) and unshaded trees (No. 3 and No. 4); data are means ± SD of three replicates; 30–35 cells of each type in the epidermis were used in each replicate. a -  signifies notable variations in the factors of tree No. 1 (with shading) from tree No. 3 (without shading) (P ≤ 0.05); b indicates substantial divergences in the variables of tree No. 2 (with shading) from tree No. 3 (without shading) (P ≤ 0. 05); c shows noteworthy differences in the parameters of tree No. 1 (with shading) from tree No. 4 (without shading) (P ≤ 0.05); d denotes noteworthy disparities in the parameters of tree No. 2 (with shading) from tree No. 4 (without shading) (P ≤ 0.05).

| Parameter | The intensity profile of silicon fluorescence in the leaf of oak four trees, relative units | | | |
| --- | --- | --- | --- | --- |
| Tree No. 1 | Tree No. 2 | Tree No. 3 | Tree No. 4 |
| *Adaxial epidermis*  Anticlinal wall of pavement cells  Periclinal wall of pavement cells  Trichome  Stomata  *Abaxial epidermis*  Anticlinal wall of pavement cells  Periclinal wall of pavement cells  Trichome  Stomata | 120 ± 13.0  70 ± 5.3  Absent  Absent  75 ± 8.8  70 ± 5.3  156 ± 11  71 ± 5.4 | 105 ± 11.0  55 ± 4.3  Absent  Absent  80 ± 9.3  23 ± 1.7  121 ± 12.0  65 ± 7.1 | 140 ± 12 b  124 ± 11 a, b  Absent  Absent  100 ± 9.7 a, b  82 ± 5.4 a, b 180 ± 15 a, b 125 ± 12 a, b | 145 ± 13 c, d  115 ± 12 c, d  Absent  Absent  120 ± 11 c, d  95 ± 7.7 c, d  185 ± 12 c, d  128 ± 11 c, d |
