# Supplementary material
Source: Research Square preprint supplement (doi:10.21203/rs.3.rs-8995237/v1)
Supplement: Supplementary file 2 [file eef1bf7214cbb2bdda692c91.docx]

**List Possible Reviewers:**

1. Professor Mateja GRAŠIČ is a specialist in the field of researching study of silica in plants .

Dr. Mateja GRAŠIČ. Department of Biology, Biotechnical Faculty, University of Ljubljana,Večna pot 111, SI-1000 Ljubljana, Slovenia. e-mail: [mateja.grasic@bf.uni-lj.si](mailto:mateja.grasic@bf.uni-lj.si)

**2. Dr. Martín-Sánchez R**, is a specialist in the field of researching the anatomy and morphology of tree leaves. Dr. Rubén Martín‑Sánchez, Departamento de Sistemas Agrícolas, Forestales y Medio Ambiente, Centro de Investigación y Tecnología Agroalimentaria de Aragón (CITA), Avda. Montañana 930, Zaragoza 50059, Spain , rmartin@cita‑aragon.es

**3. Dr. Elina Oksanen** is a specialist in the field of researching the anatomy and morphology of tree leaves**.** Dr. Elina Oksanen - Department of Environmental and Biological Sciences, University of Eastern Finland, PO Box 111, 80101 Joensuu, Finland. Email: elina.oksanen@uef.fi

**4. Dr.** [**Caroline Müller**](https://pubmed.ncbi.nlm.nih.gov/?term=M%C3%BCller+C&cauthor_id=16273432)is a specialist in the field of researching the anatomy and morphology of tree leaves. Dr. [Caroline Müller](https://pubmed.ncbi.nlm.nih.gov/?term=M%C3%BCller+C&cauthor_id=16273432) Julius-von-Sachs-Institut für Biowissenschaften, Universität Würzburg, Julius-von-Sachs-Platz 3, D-97082 Würzburg, Germany. cmueller@botanik.uni-wuerzburg.de
